# Supplementary material for: Design, Synthesis and Molecular Docking Study of Novel 3-Phenyl-β-Alanine-Based Oxadiazole Analogues as Potent Carbonic Anhydrase II Inhibitors
Source: MDPI journal article supplement (doi:10.3390/molecules27030816), 2022-01-26
Supplement: s1 [file s1]

Supporting Information

# Design, Synthesis and Molecular Docking Study of Novel Phenylalanine Based Oxadiazole Analogues as Potent Carbonic Anhydrase II Inhibitors

Kashif Rafiq <sup>1,2</sup>, Najeeb Ur Rehman <sup>1,\*</sup>, Sobia Ahsan Halim<sup>1</sup>, Majid Khan <sup>1,3</sup>, Ajmal Khan <sup>1</sup>  
and Ahmed Al-Harrasi <sup>1,\*</sup>

<sup>1</sup> Natural and Medical Sciences Research Center, University of Nizwa, P.O Box 33, Birkat Al Mauz, Nizwa 616, Oman; kashifrafiq@unizwa.edu.om (K.R.); sobia\_halim@unizwa.edu.om (S.A.H.); majidk166@yahoo.com (M.K.); ajmalkhan@unizwa.edu.om (A.K.)

<sup>2</sup> Department of Chemistry, Abdul Wali Khan University Mardan, Mardan 23200, Pakistan

<sup>3</sup> H. E. J. Research Institute of Chemistry, International Center for Chemical and Biological Sciences, University of Karachi, Karachi 75270, Pakistan

\* Correspondence: najeeb@unizwa.edu.om (N.U.R.); aharrasi@unizwa.edu.om (A.A.-H.); Tel.: +968-2544-6328 (A.A.-H.); Fax: +968-2544-6612 (A.A.-H.)

## List of Figures

**Figure S1.** <sup>1</sup>H-NMR (CDCl<sub>3</sub>, 600 MHz) of compound **4a**

**Figure S2.** <sup>13</sup>C NMR (CDCl<sub>3</sub>, 125 MHz) of compound **4a**

**Figure S3:** HRMS (ESI<sup>+</sup>) of compound **4a**

**Figure S4.** <sup>1</sup>H-NMR (CDCl<sub>3</sub>, 600 MHz) of compound **4b**

**Figure S5.** <sup>13</sup>C NMR (CDCl<sub>3</sub>, 125 MHz) of compound **4b**

**Figure S6:** HRMS (ESI<sup>+</sup>) of compound **4b**

**Figure S7.** <sup>1</sup>H-NMR (CDCl<sub>3</sub>, 600 MHz) of compound **4c**

**Figure S8.** <sup>13</sup>C NMR (CDCl<sub>3</sub>, 125 MHz) of compound **4c**

**Figure S9:** HRMS (ESI<sup>+</sup>) of compound **4c**

**Figure S10.** <sup>1</sup>H-NMR (CDCl<sub>3</sub>, 600 MHz) of compound **4d**

**Figure S11.** <sup>13</sup>C NMR (CDCl<sub>3</sub>, 125 MHz) of compound **4d**

**Figure S12:** HRMS (ESI<sup>+</sup>) of compound **4d**

**Figure S13.** <sup>1</sup>H-NMR (CDCl<sub>3</sub>, 600 MHz) of compound **4e**

**Figure S14.** <sup>13</sup>C NMR (CDCl<sub>3</sub>, 125 MHz) of compound **4e**

**Figure S15:** HRMS (ESI<sup>+</sup>) of compound **4e**

**Figure S16.** <sup>1</sup>H-NMR (CDCl<sub>3</sub>, 600 MHz) of compound **4f**

**Figure S17.** <sup>13</sup>C NMR (CDCl<sub>3</sub>, 125 MHz) of compound **4f**

**Figure S18:** HRMS (ESI<sup>+</sup>) of compound **4f**

**Figure S19.** <sup>1</sup>H-NMR (CDCl<sub>3</sub>, 600 MHz) of compound **4g**

**Figure S20.** <sup>13</sup>C NMR (CDCl<sub>3</sub>, 125 MHz) of compound **4g**

**Figure S21:** HRMS (ESI<sup>+</sup>) of compound **4g**

**Figure S22.** <sup>1</sup>H-NMR (CDCl<sub>3</sub>, 600 MHz) of compound **4h**

**Figure S23.**  $^{13}\text{C}$  NMR ( $\text{CDCl}_3$ , 125 MHz) of compound **4h**

**Figure S24:** HRMS ( $\text{ESI}^+$ ) of compound **4h**

**Figure S25.**  $^1\text{H}$ -NMR ( $\text{CDCl}_3$ , 600 MHz) of compound **4i**

**Figure S26.**  $^{13}\text{C}$  NMR ( $\text{CDCl}_3$ , 125 MHz) of compound **4i**

**Figure S27:** HRMS ( $\text{ESI}^+$ ) of compound **4i**

**Figure S28.**  $^1\text{H}$ -NMR ( $\text{CDCl}_3$ , 600 MHz) of compound **4j**

**Figure S29.**  $^{13}\text{C}$  NMR ( $\text{CDCl}_3$ , 125 MHz) of compound **4j**

**Figure S30:** HRMS ( $\text{ESI}^+$ ) of compound **4j**

**Figure S31.**  $^1\text{H}$ -NMR ( $\text{CDCl}_3$ , 600 MHz) of compound **4k**

**Figure S32.**  $^{13}\text{C}$  NMR ( $\text{CDCl}_3$ , 125 MHz) of compound **4k**

**Figure S33:** HRMS ( $\text{ESI}^+$ ) of compound **4k**

**Figure S34.**  $^1\text{H}$ -NMR ( $\text{CDCl}_3$ , 600 MHz) of compound **4l**

**Figure S35.**  $^{13}\text{C}$  NMR ( $\text{CDCl}_3$ , 125 MHz) of compound **4l**

**Figure S36:** HRMS ( $\text{ESI}^+$ ) of compound **4l**

**Figure S37:** The re-docked orientation of acetazolamide.

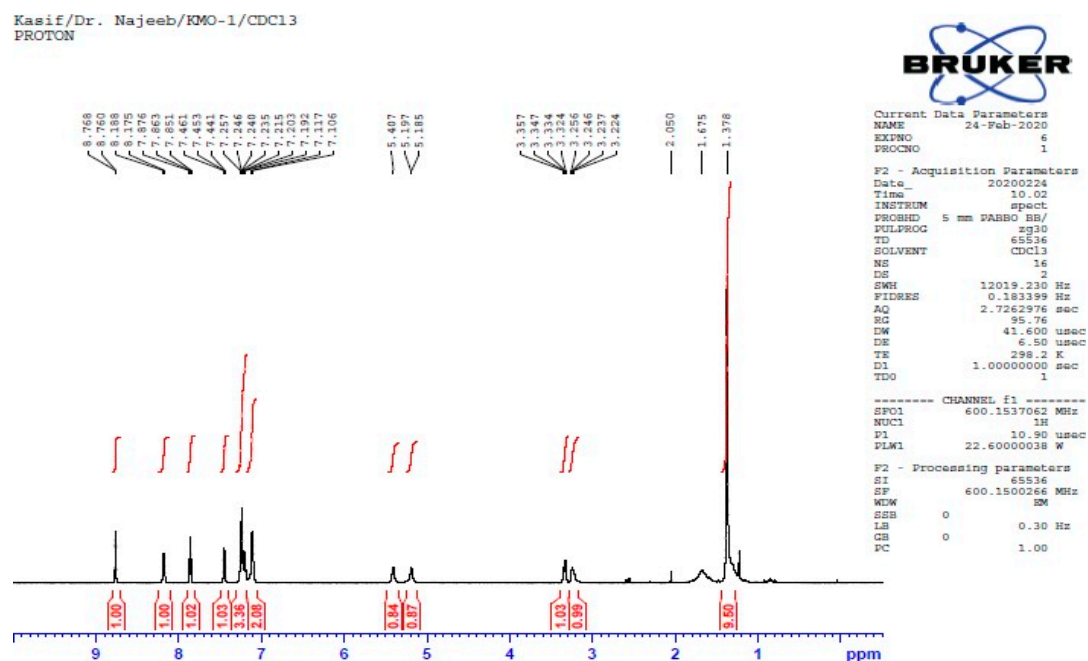

**Figure S1.**  $^1\text{H}$ -NMR ( $\text{CDCl}_3$ , 600 MHz) of compound **4a** fix font and size of figure labels.

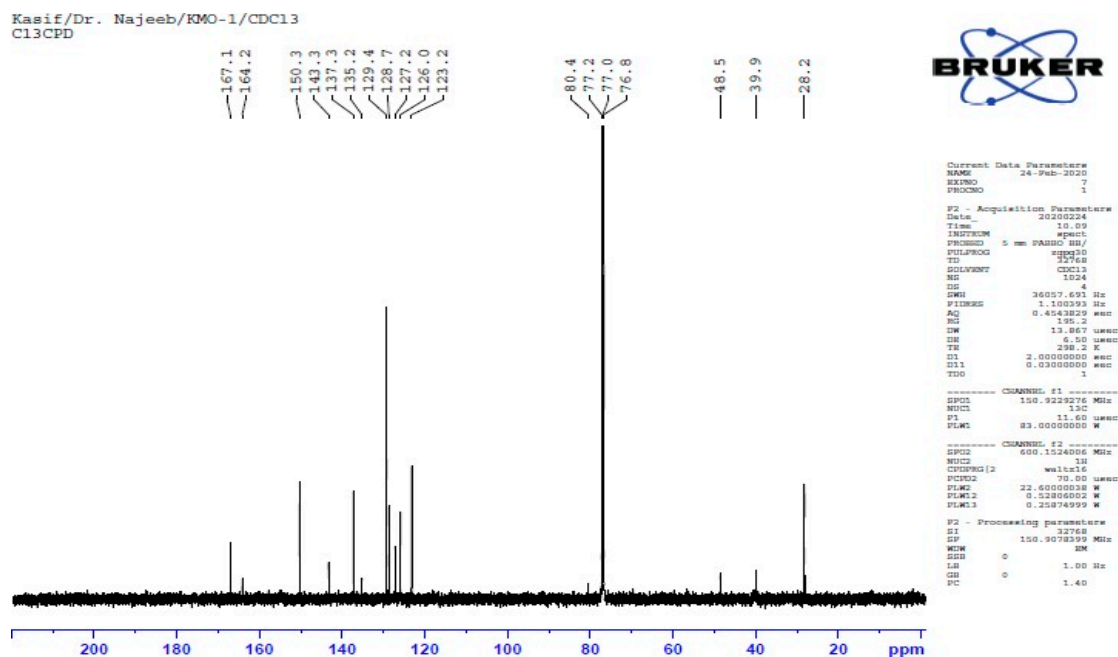Figure S2. <sup>13</sup>C-NMR (CDCl<sub>3</sub>, 600 MHz) of compound 4a.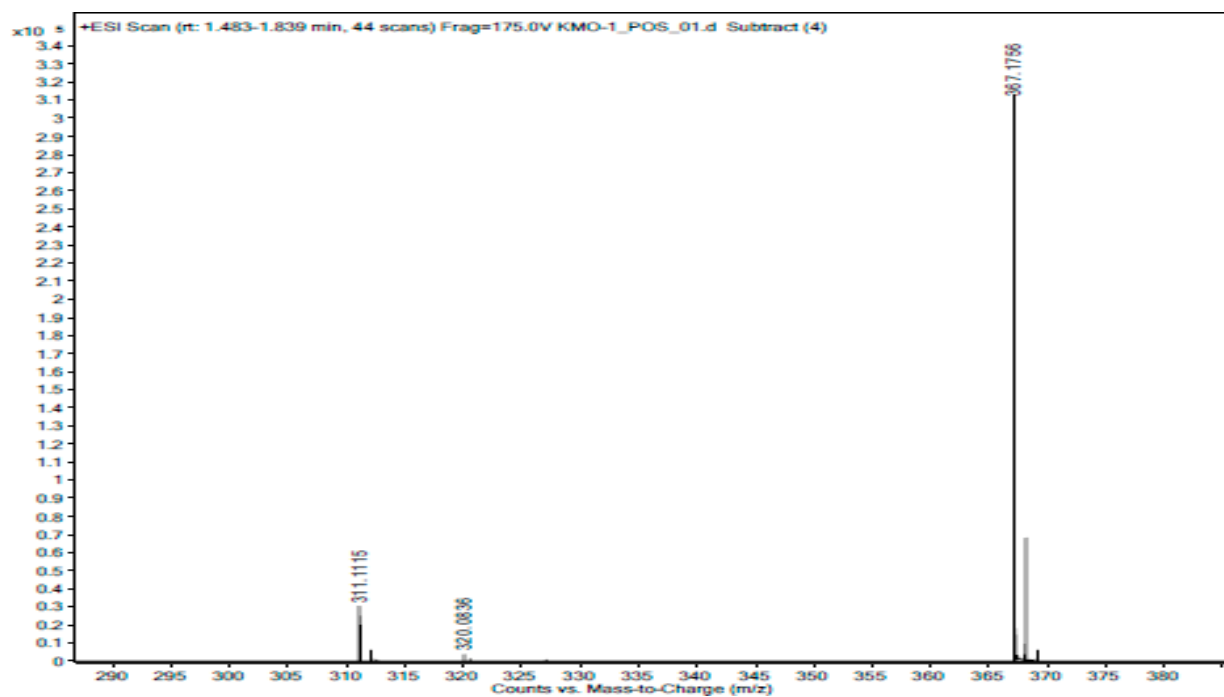Figure S3. HRMS (ESI<sup>+</sup>) of compound 4a.

Kashif/Dr. Najeeb/KMO-2A/CDC13  
PROTON

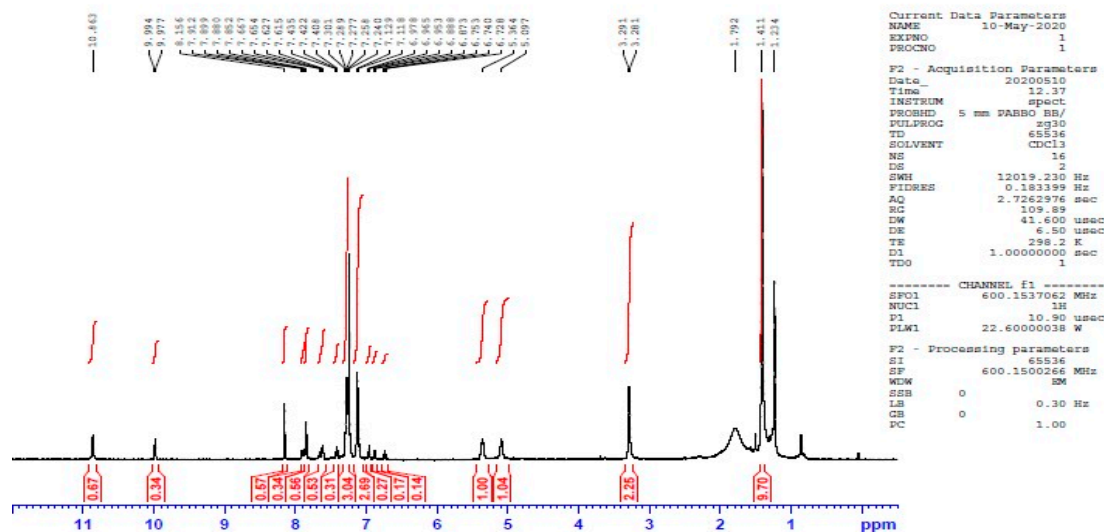

Figure S5.  $^{13}\text{C}$ -NMR ( $\text{CDCl}_3$ , 125 MHz) of compound **4b**.

Kashif/Dr. Najeeb/KMO-2A/CDC13  
C13CPD

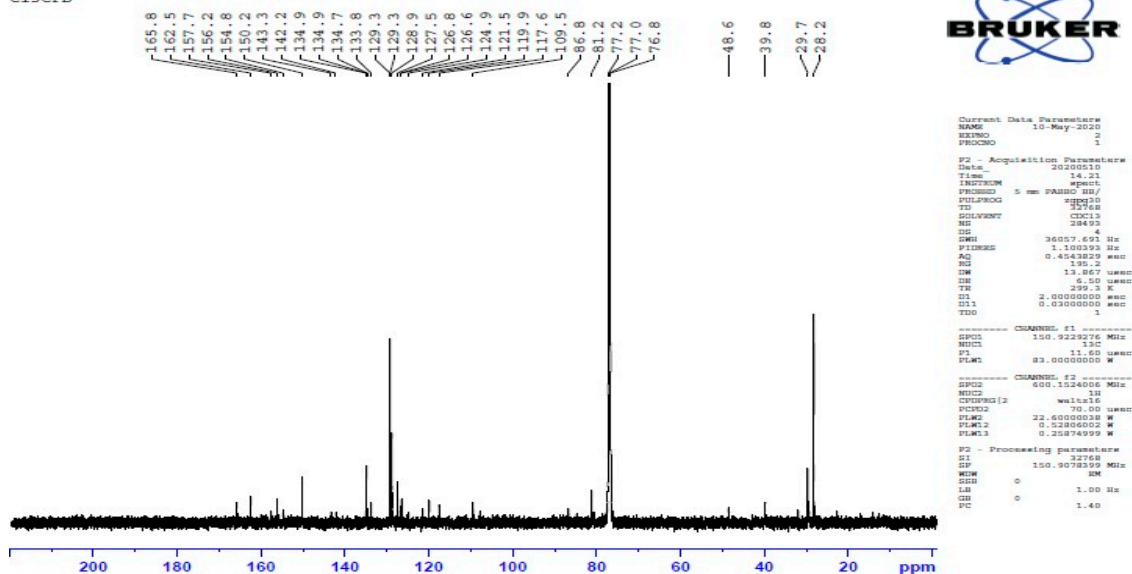

Figure S4.  $^1\text{H}$ -NMR ( $\text{CDCl}_3$ , 600 MHz) of compound **4b**.

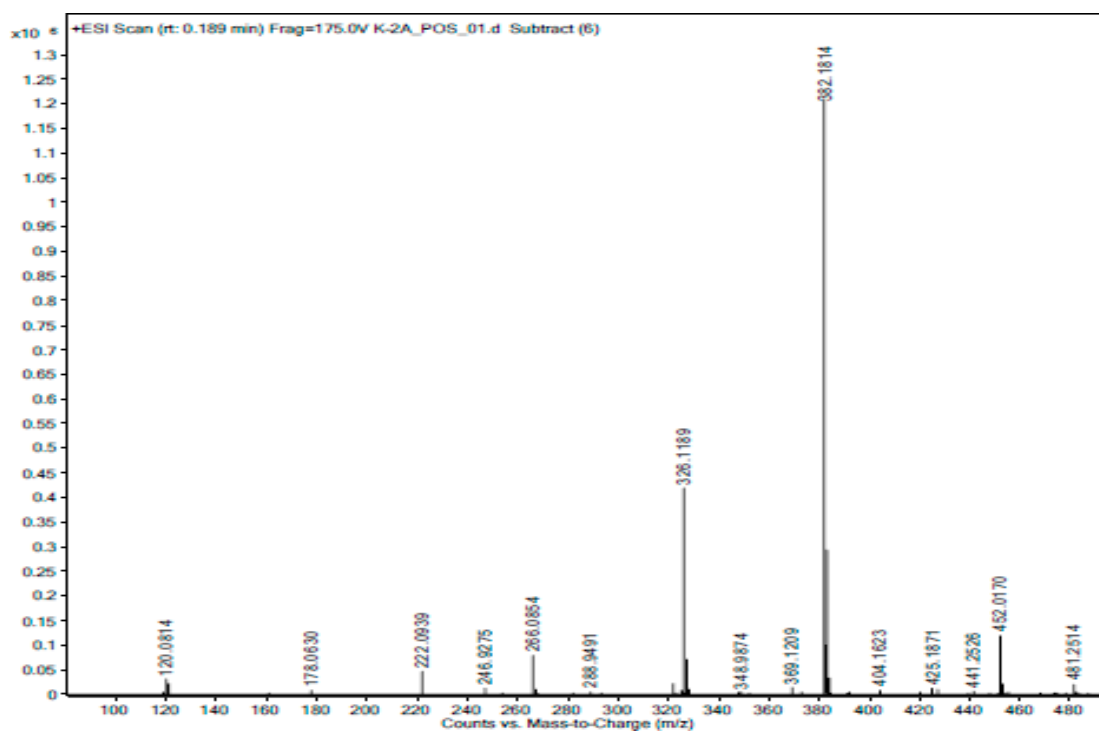Figure S6. HRMS (ESI<sup>+</sup>) of compound 4b.

Kashif/Dr. Najeeb/KMO-3/CDC13  
PROTON

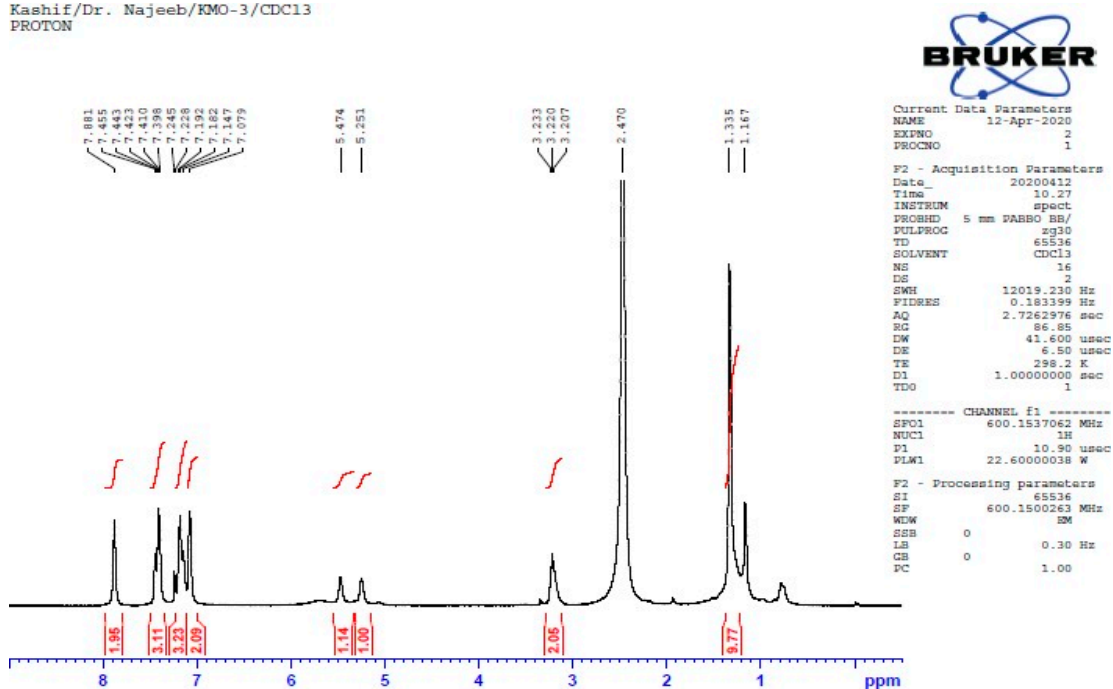Figure S7. <sup>1</sup>H-NMR (CDCl<sub>3</sub>, 600 MHz) of compound 4c.

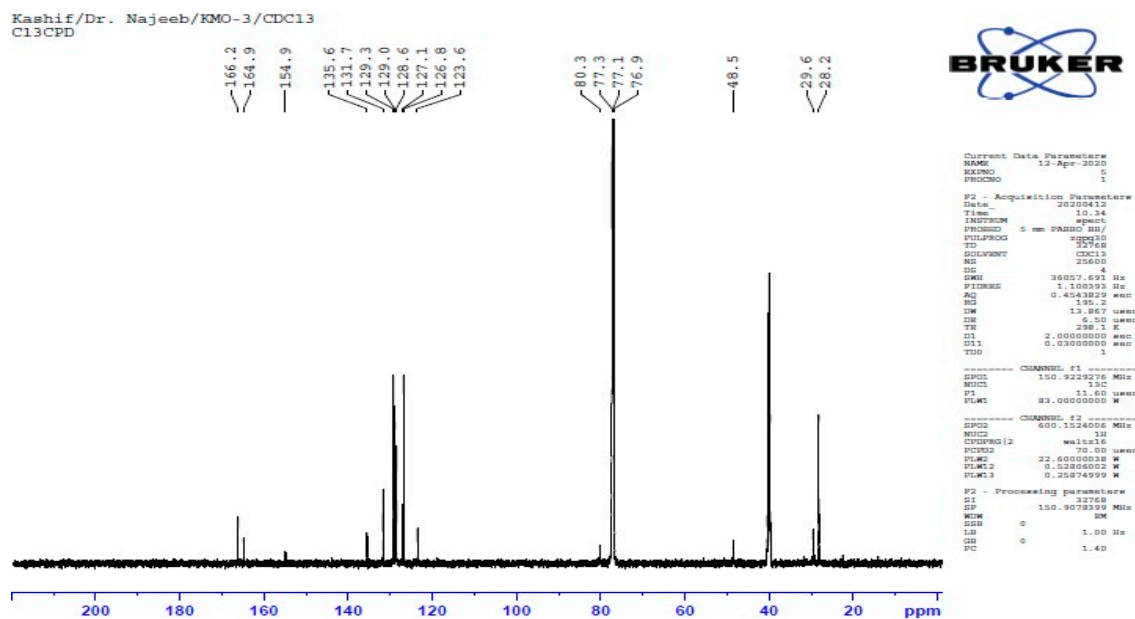Figure S8. <sup>13</sup>C-NMR (CDCl<sub>3</sub>, 125 MHz) of compound 4c.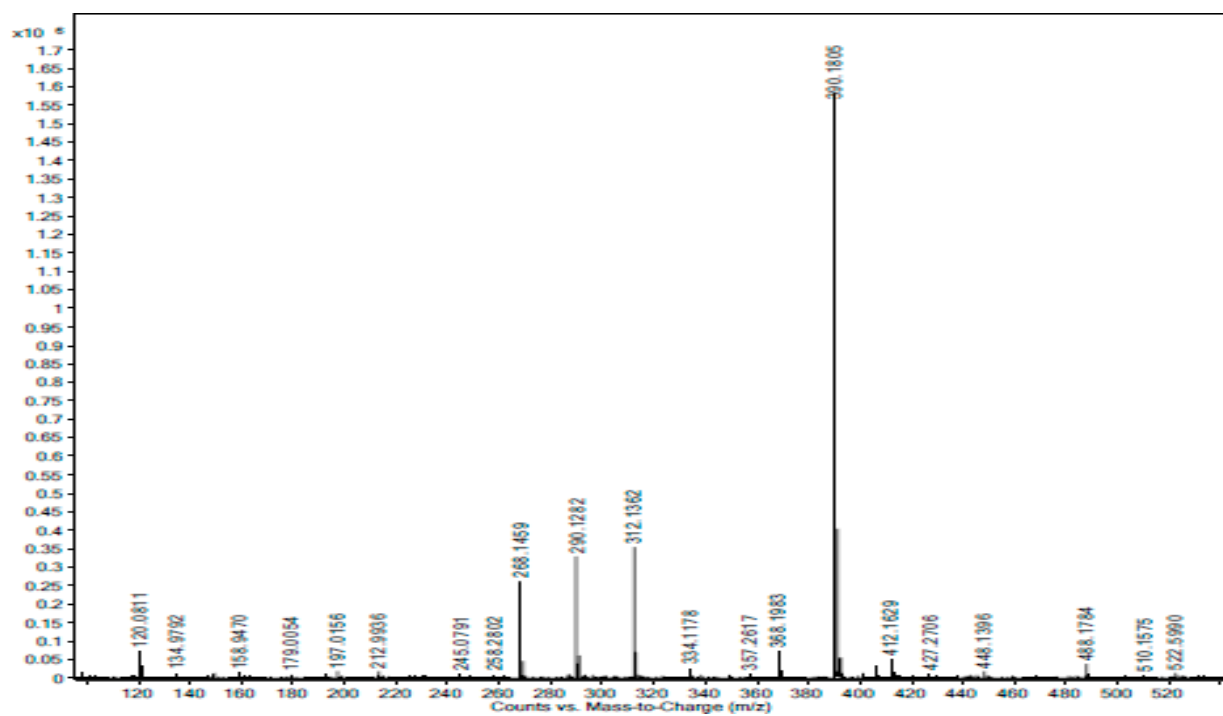Figure S9. HRMS (ESI<sup>+</sup>) of compound 4c.

Kashif/Dr. Najeeb/KMO-4/CDC13  
PROTON

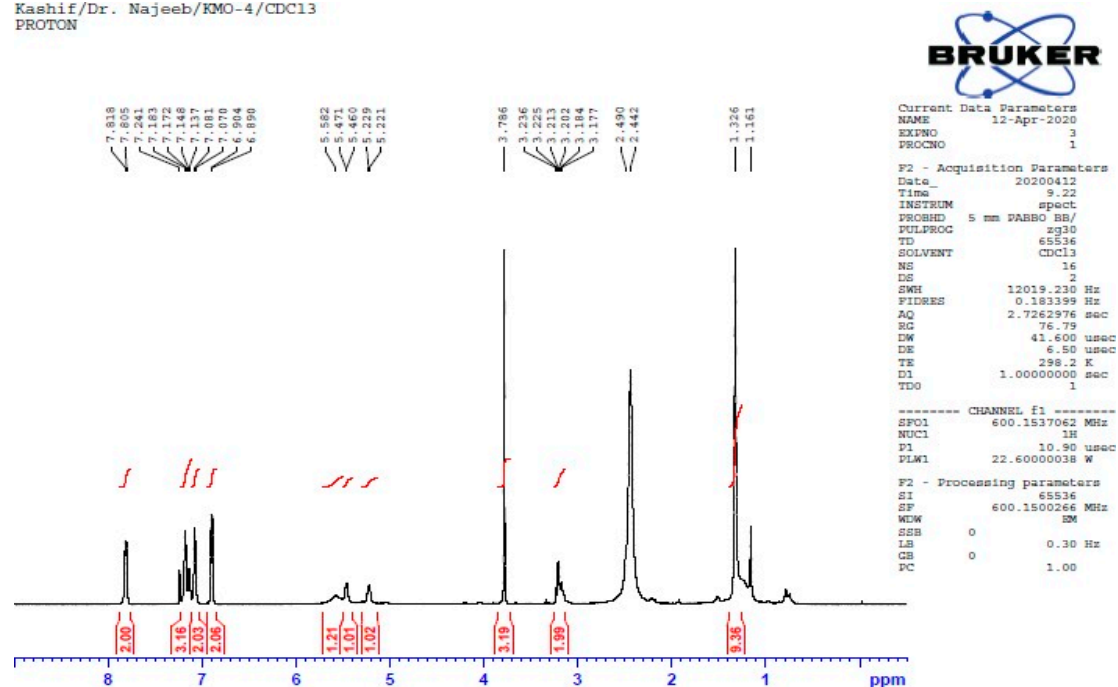

Figure S10.  $^1\text{H}$ -NMR ( $\text{CDCl}_3$ , 600 MHz) of compound 4d.

Kashif/Dr. Najeeb/KMO-4/CDC13  
C13CPD

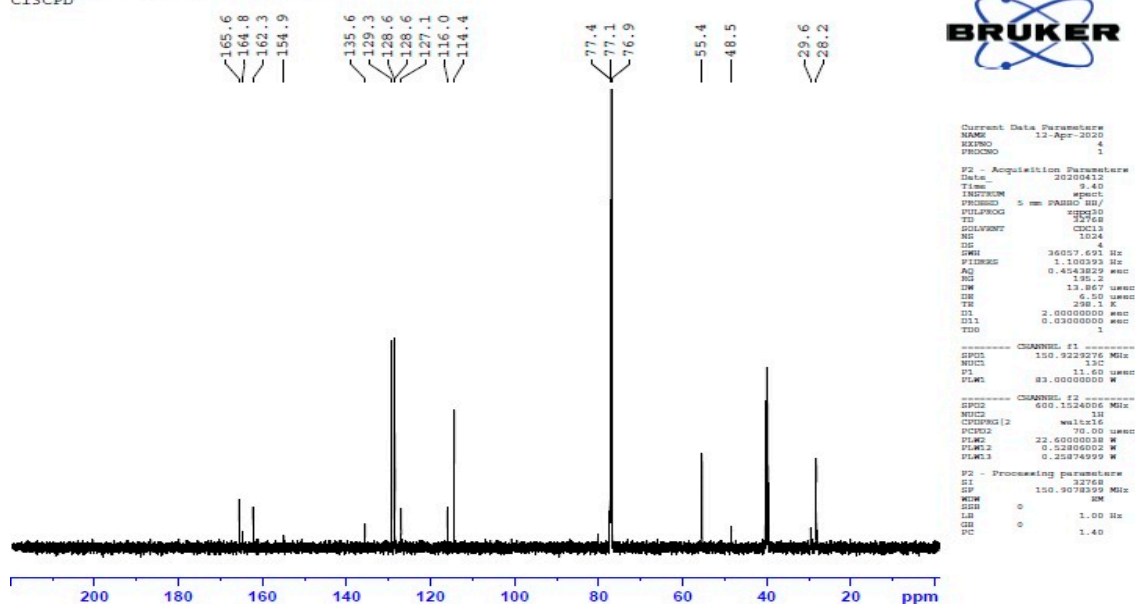

Figure S11.  $^{13}\text{C}$ -NMR ( $\text{CDCl}_3$ , 125 MHz) of compound 4d.



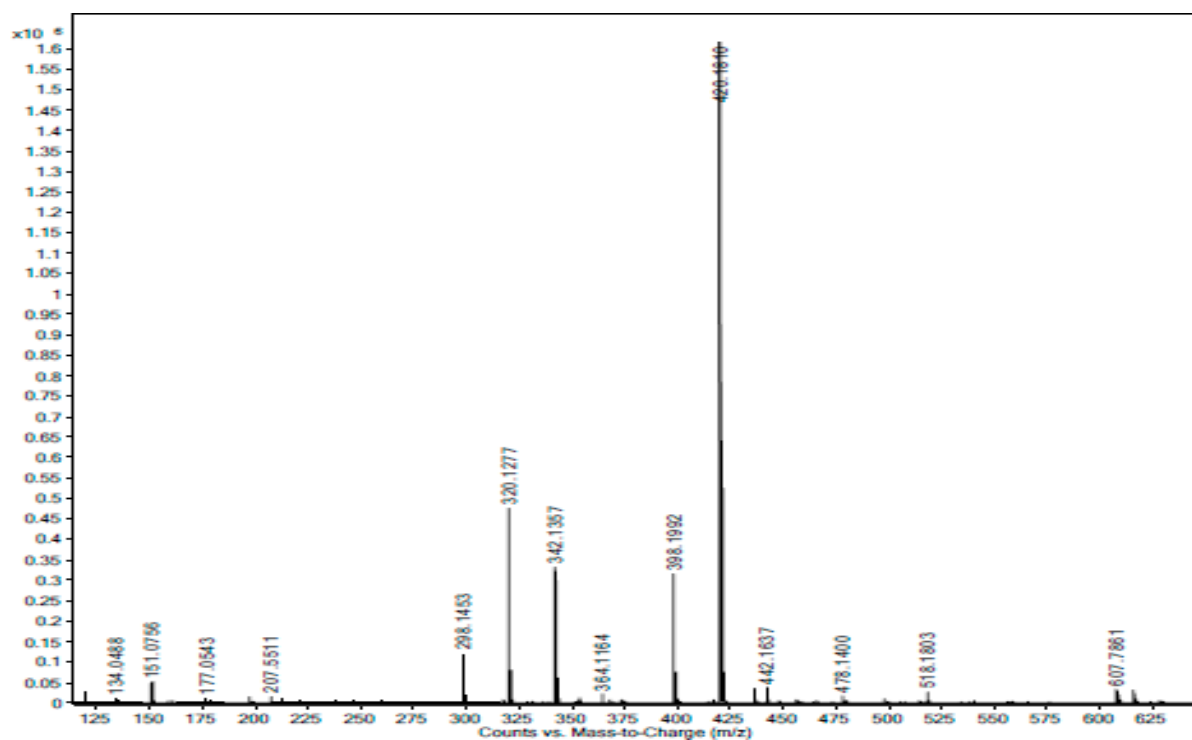Figure S12. HRMS (ESI<sup>+</sup>) of compound 4d.

Kashif/Dr. Najeeb/KMO-5/CDC13  
PROTON

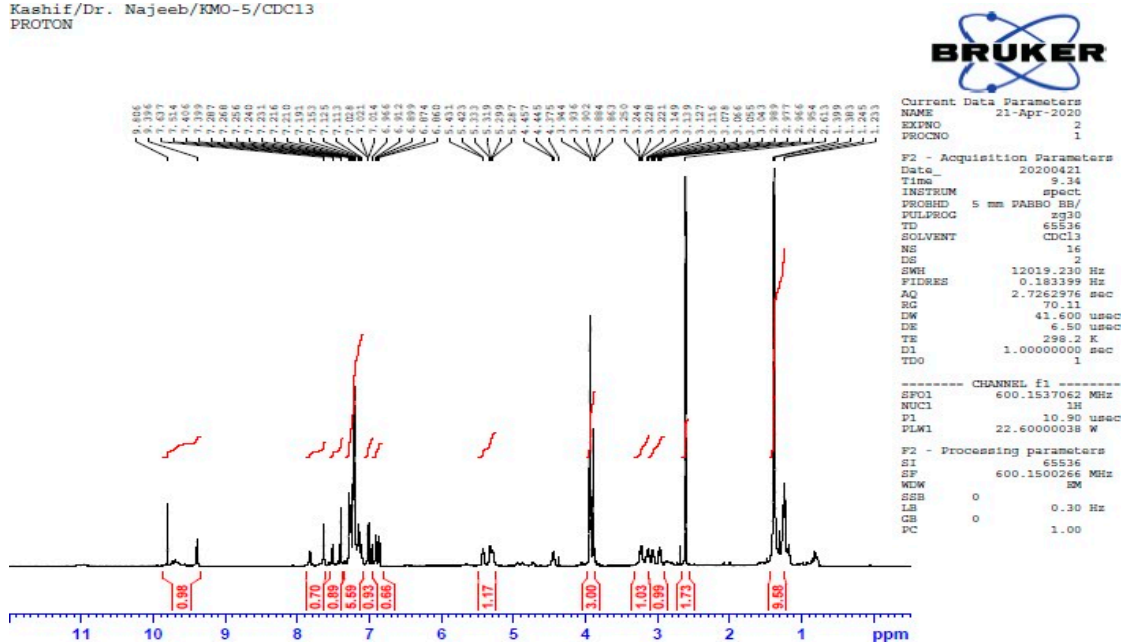Figure S13. <sup>1</sup>H-NMR (CDCl<sub>3</sub>, 600 MHz) of compound 4e.



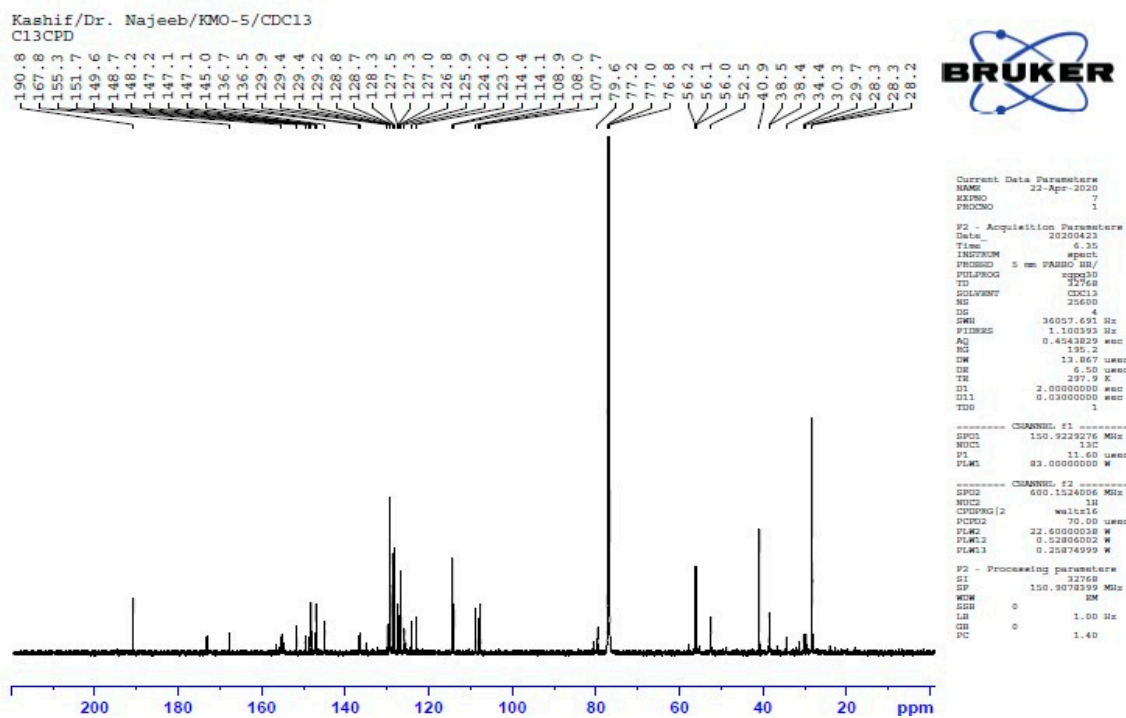Figure S14. <sup>13</sup>C-NMR (CDCl<sub>3</sub>, 125 MHz) of compound 4e.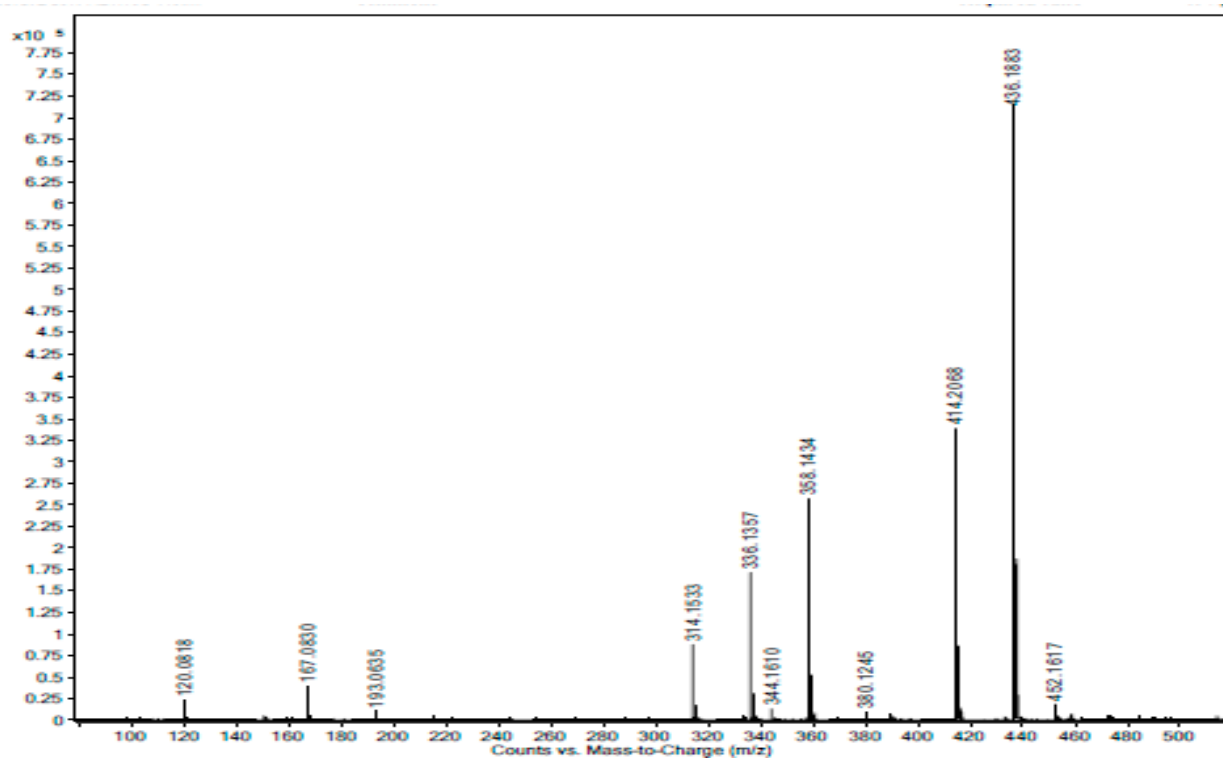Figure S15. HRMS (ESI<sup>+</sup>) of compound 4e.

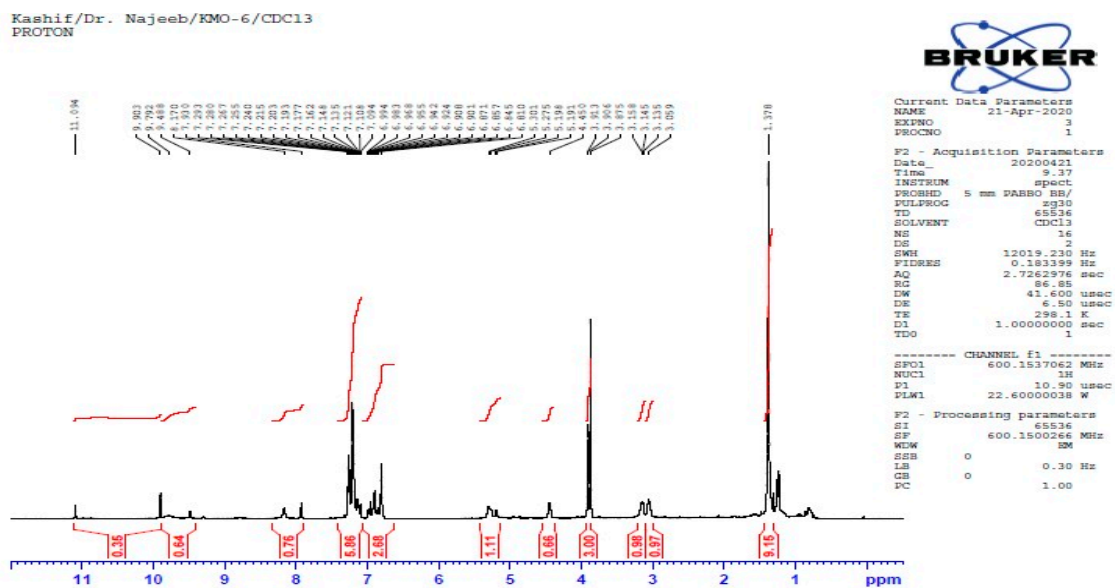Figure S16. <sup>1</sup>H-NMR (CDCl<sub>3</sub>, 600 MHz) of compound 4f.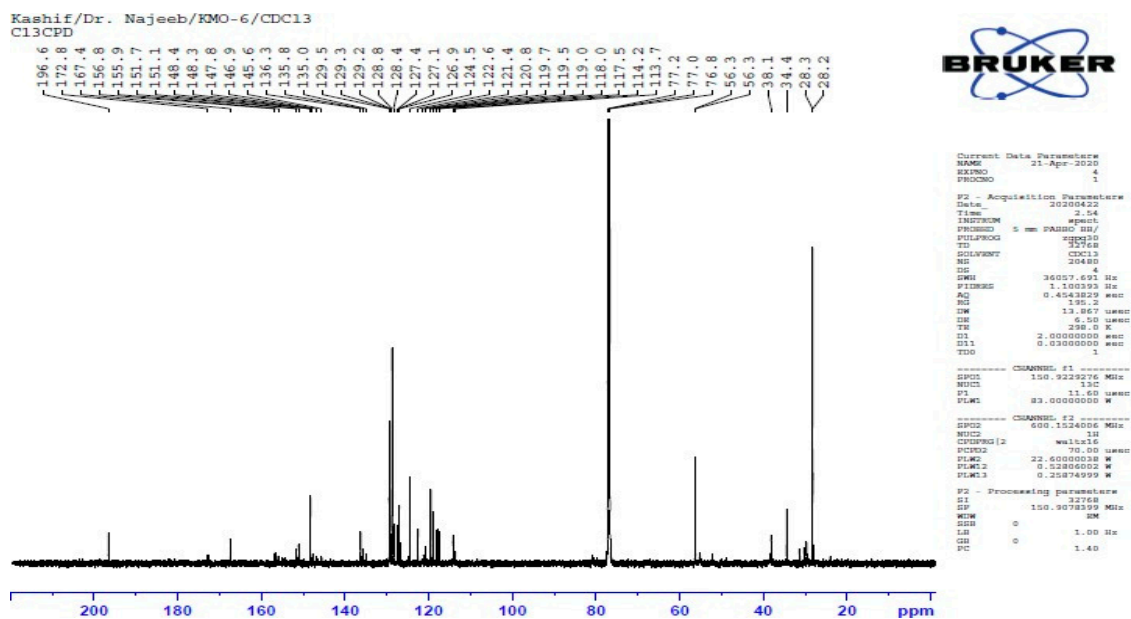Figure S17. <sup>13</sup>C-NMR (CDCl<sub>3</sub>, 125 MHz) of compound 4f.

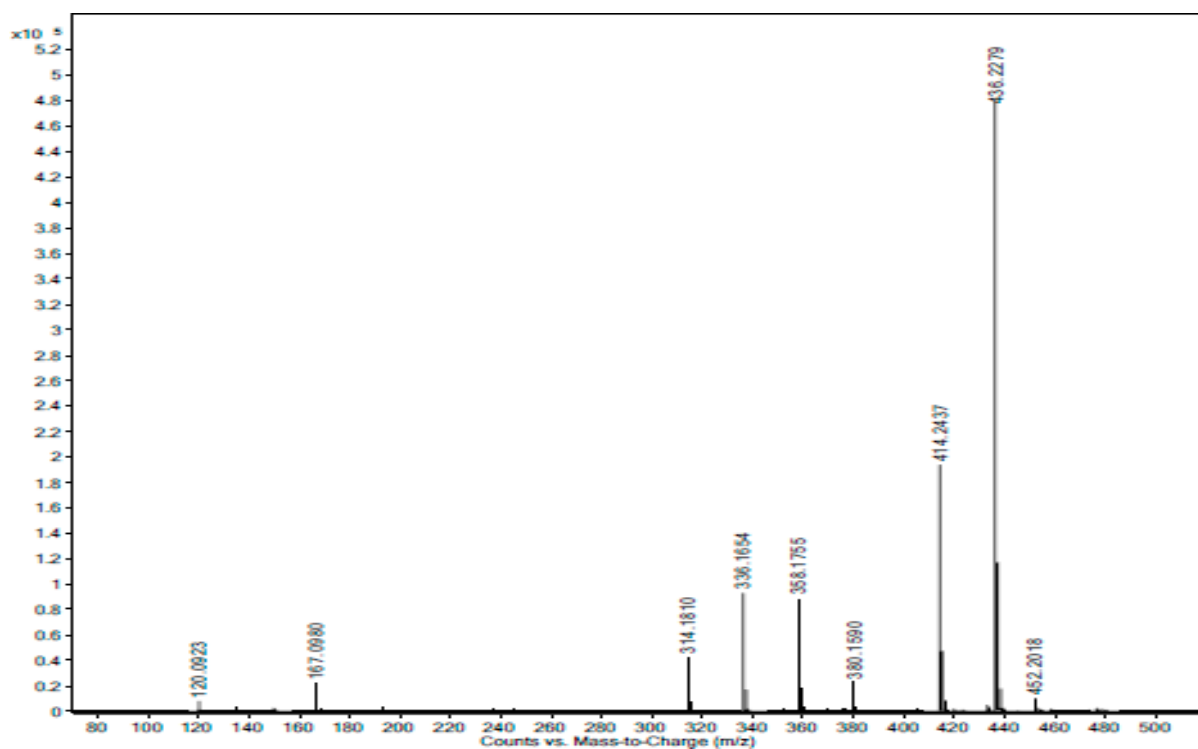Figure S18. HRMS (ESI<sup>+</sup>) of compound 4f.

Kashif/Dr. Najeeb/RMO-7/CDCl<sub>3</sub>  
PROTON

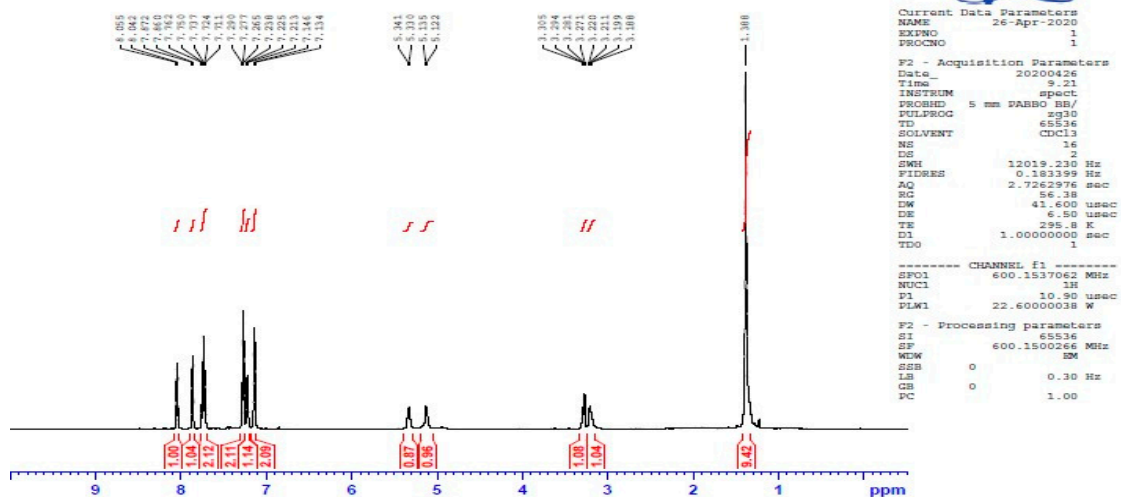Figure S19. <sup>1</sup>H-NMR (CDCl<sub>3</sub>, 600 MHz) of compound 4g.

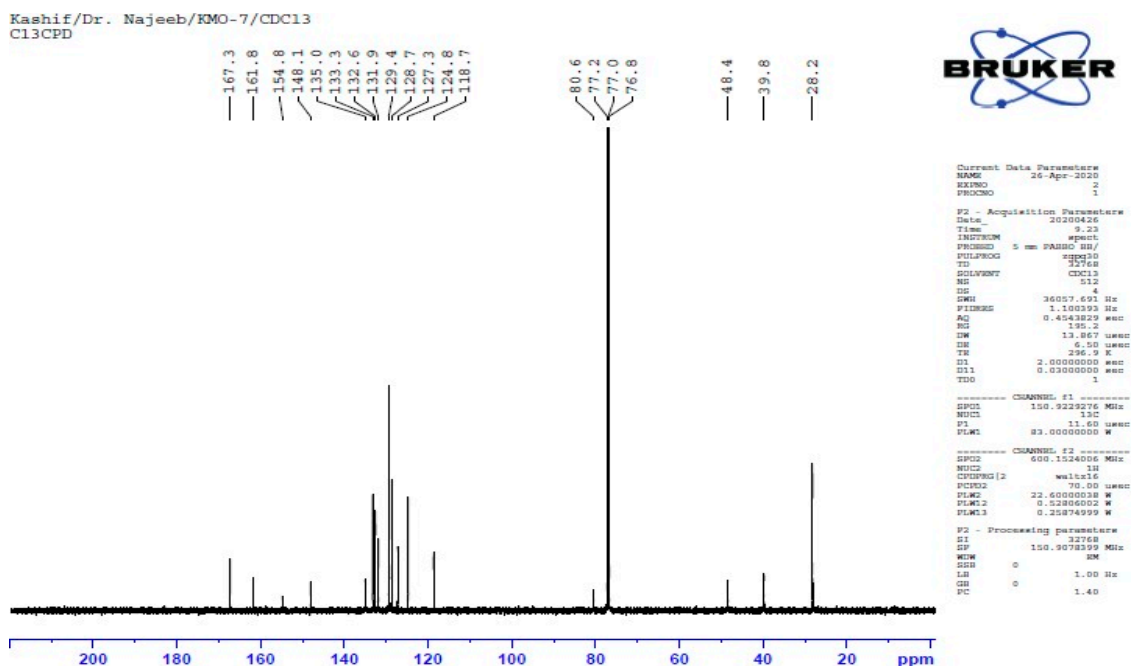Figure S20.  $^{13}\text{C}$ -NMR ( $\text{CDCl}_3$ , 125 MHz) of compound **4g**.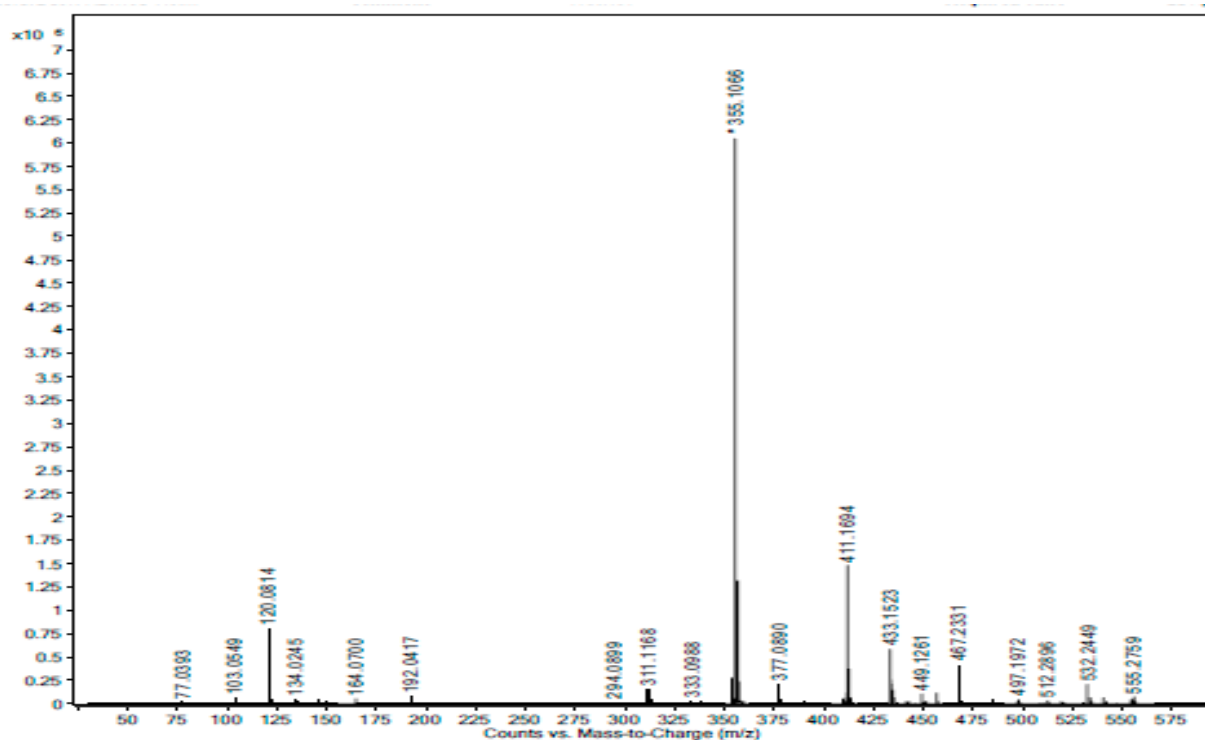Figure S21. HRMS ( $\text{ESI}^+$ ) of compound **4g**.

Kashif/Dr. Najeeb/KMO-9/CDC13  
PROTON

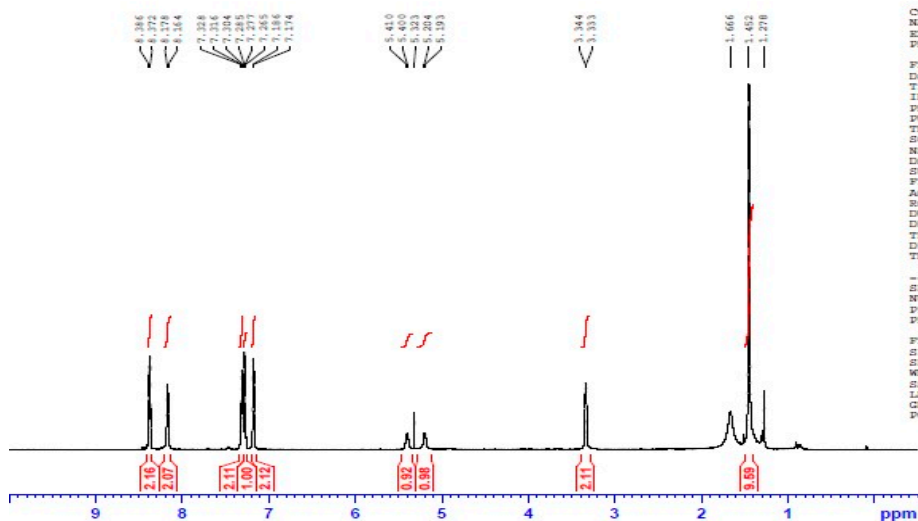

Figure S22.  $^1\text{H}$ -NMR ( $\text{CDCl}_3$ , 600 MHz) of compound 4h.

Kashif/Dr. Najeeb/KMO-9/CDC13  
C13CPD

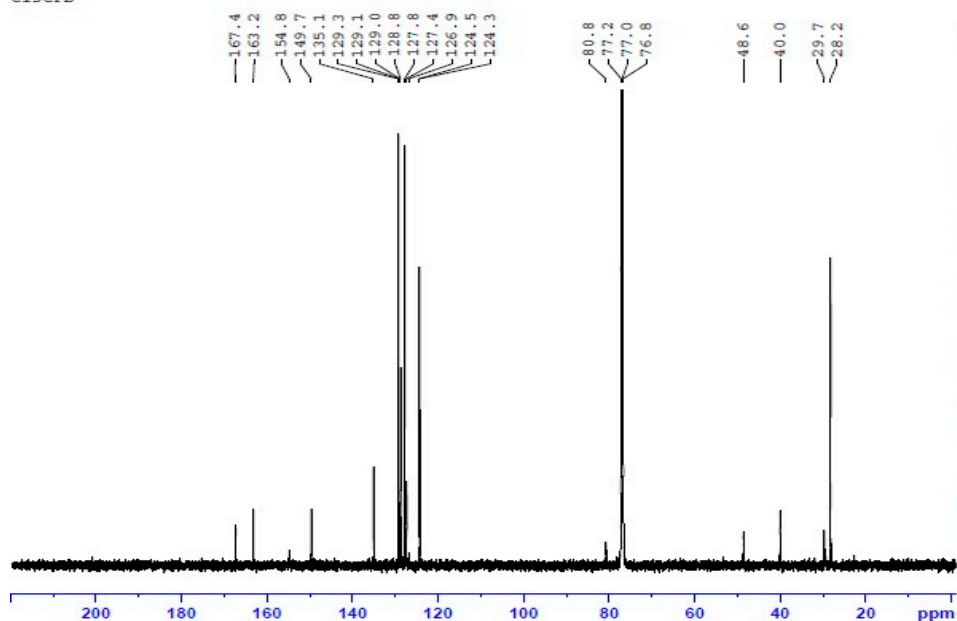

Figure S23.  $^{13}\text{C}$ -NMR ( $\text{CDCl}_3$ , 125 MHz) of compound 4h.

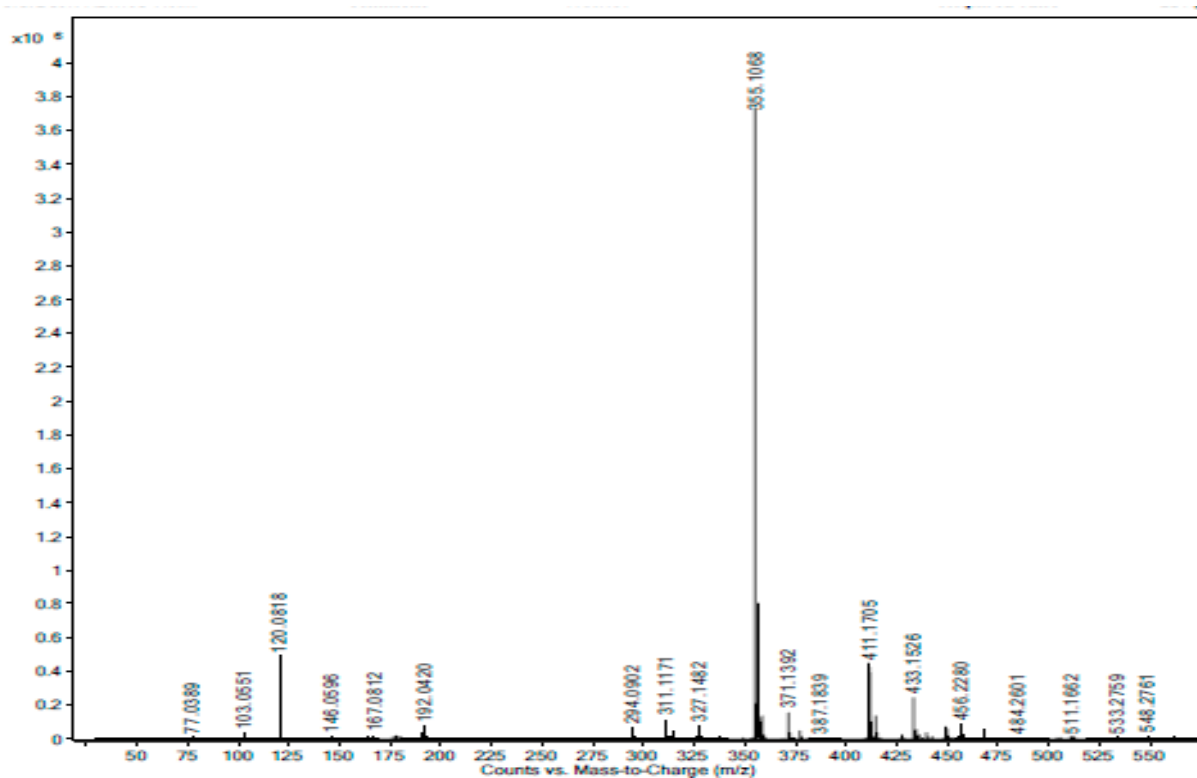Figure S24. HRMS (ESI<sup>+</sup>) of compound 4h.

Kashif/Dr. Najeel/KMO-10/CDCl<sub>3</sub>  
PROTON

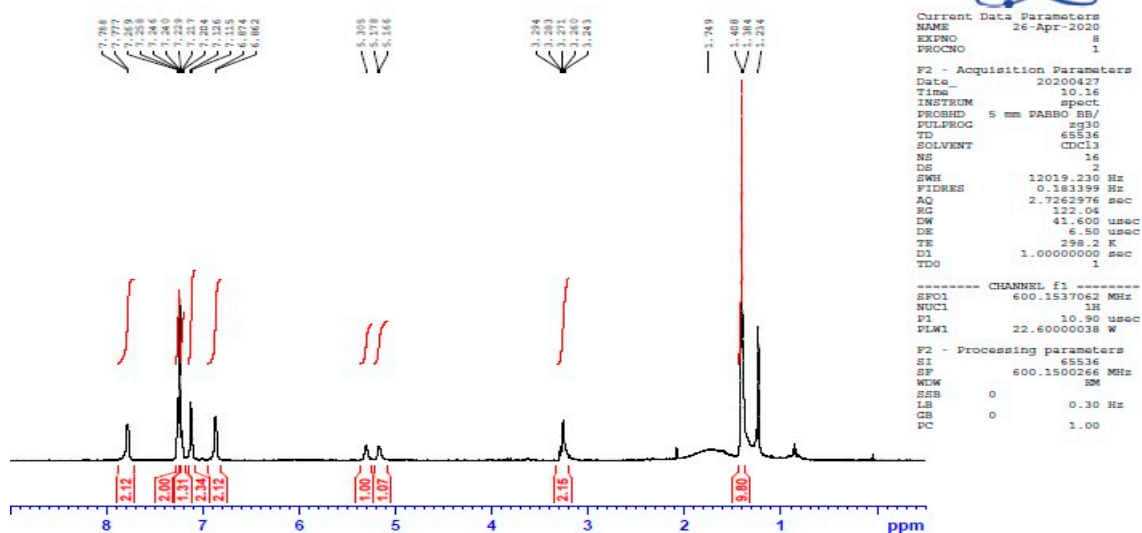Figure S25. <sup>1</sup>H-NMR (CDCl<sub>3</sub>, 600 MHz) of compound 4i.

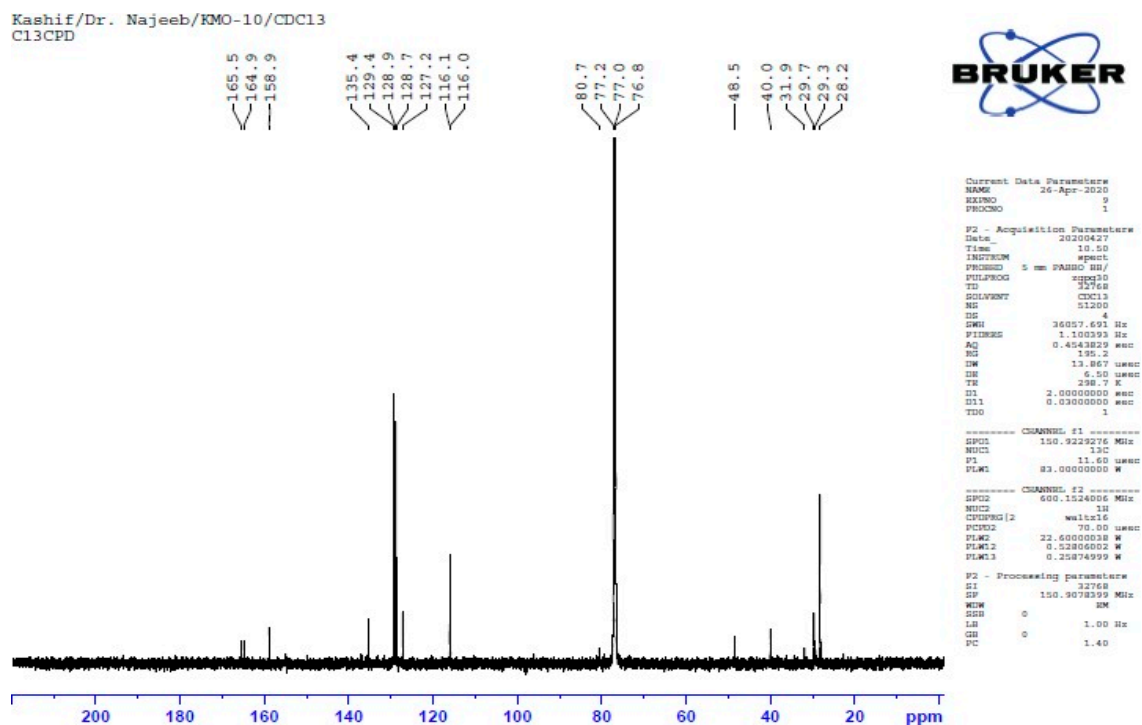Figure S26.  $^{13}\text{C}$ -NMR ( $\text{CDCl}_3$ , 125 MHz) of compound **4i**.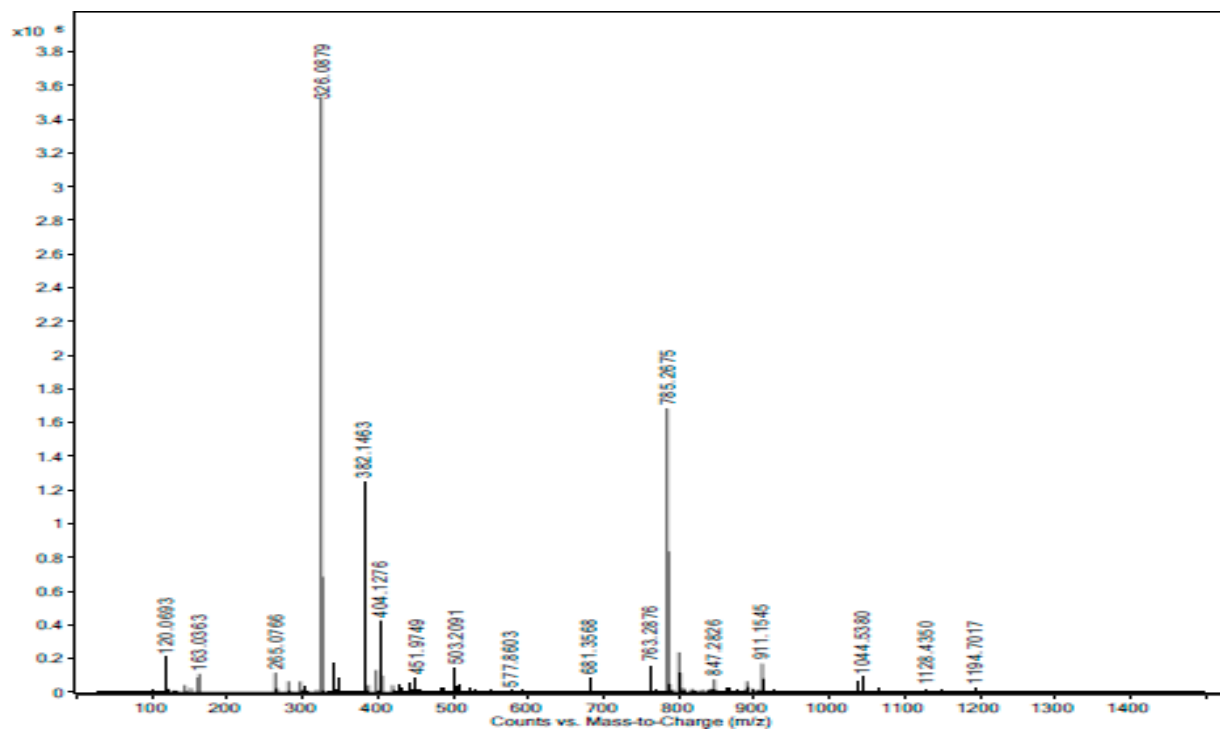Figure S27. HRMS ( $\text{ESI}^+$ ) of compound **4i**.



Kashif/Dr. Najeeb/KMO-12A/CDC13  
PROTON

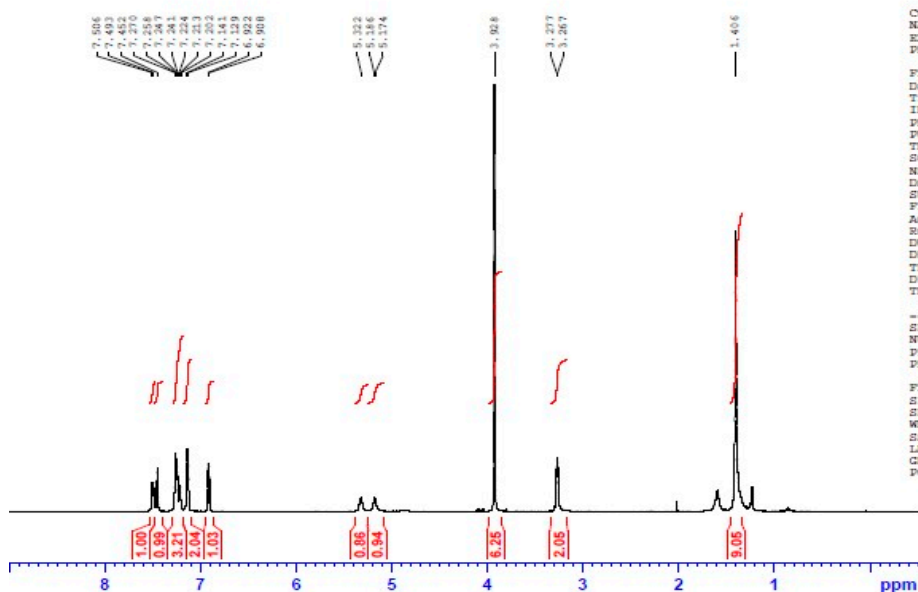

Figure S28.  $^1\text{H}$ -NMR ( $\text{CDCl}_3$ , 600 MHz) of compound 4j.

Kashif/Dr. Najeeb/KMO-12A/CDC13  
C13CPD

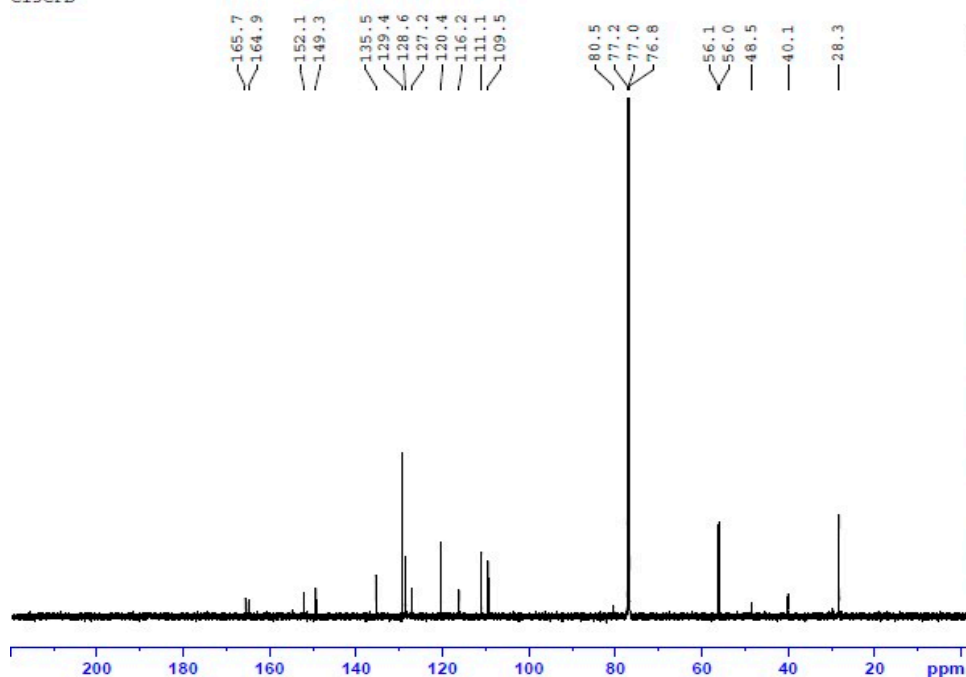

Figure S29.  $^{13}\text{C}$ -NMR ( $\text{CDCl}_3$ , 125 MHz) of compound 4j.

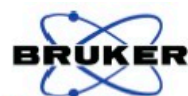

Current Data Parameters  
NAME 29-Apr-2020  
EXPNO 1  
PROCNO 1  
F2 - Acquisition Parameters  
Date\_ 20200429  
Time 9.05  
INSTRUM spect  
PROBHD 5 mm DABBO BB/  
PULPROG zg30  
TD 65536  
SOLVENT  $\text{CDCl}_3$   
NS 16  
DS 2  
SWH 12019.230 Hz  
FIDRES 0.183399 Hz  
AQ 2.7262976 sec  
RG 86.85  
DM 41.600 usec  
DE 6.50 usec  
TE 298.1 K  
D1 1.00000000 sec  
TD0 1  
----- CHANNEL f1 -----  
SFO1 600.1537062 MHz  
NUC1  $^1\text{H}$   
P1 10.90 usec  
PLW1 22.60000038 W  
F2 - Processing parameters  
SI 65536  
SF 600.1500266 MHz  
WDW EM  
SSB 0  
LB 0.30 Hz  
GB 0  
PC 1.00

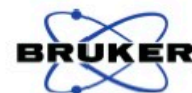

Current Data Parameters  
NAME 29-Apr-2020  
EXPNO 2  
PROCNO 1  
F2 - Acquisition Parameters  
Date\_ 20200429  
Time 9.54  
INSTRUM spect  
PROBHD 5 mm DABBO BB/  
PULPROG zgpg30  
TD 32768  
SOLVENT  $\text{CDCl}_3$   
NS 4  
DS 4  
SWH 36057.691 Hz  
FIDRES 1.100393 Hz  
AQ 0.4543829 sec  
RG 195.2  
DM 13.867 usec  
DE 6.50 usec  
TE 298.0 K  
D1 2.00000000 sec  
D11 0.03000000 sec  
TD0 1  
----- CHANNEL f1 -----  
SFO1 150.9229276 MHz  
NUC1  $^{13}\text{C}$   
P1 11.60 usec  
PLW1 23.00000000 W  
----- CHANNEL f2 -----  
SFO2 600.1524006 MHz  
NUC2  $^1\text{H}$   
CPDPRG2 waltz16  
PCPD2 70.00 usec  
PLW2 22.60000038 W  
PLW3 0.52806002 W  
PLW4 0.25874999 W  
F2 - Processing parameters  
SI 32768  
SF 150.9078399 MHz  
WDW EM  
SSB 0  
LB 1.00 Hz  
GB 0  
PC 1.40

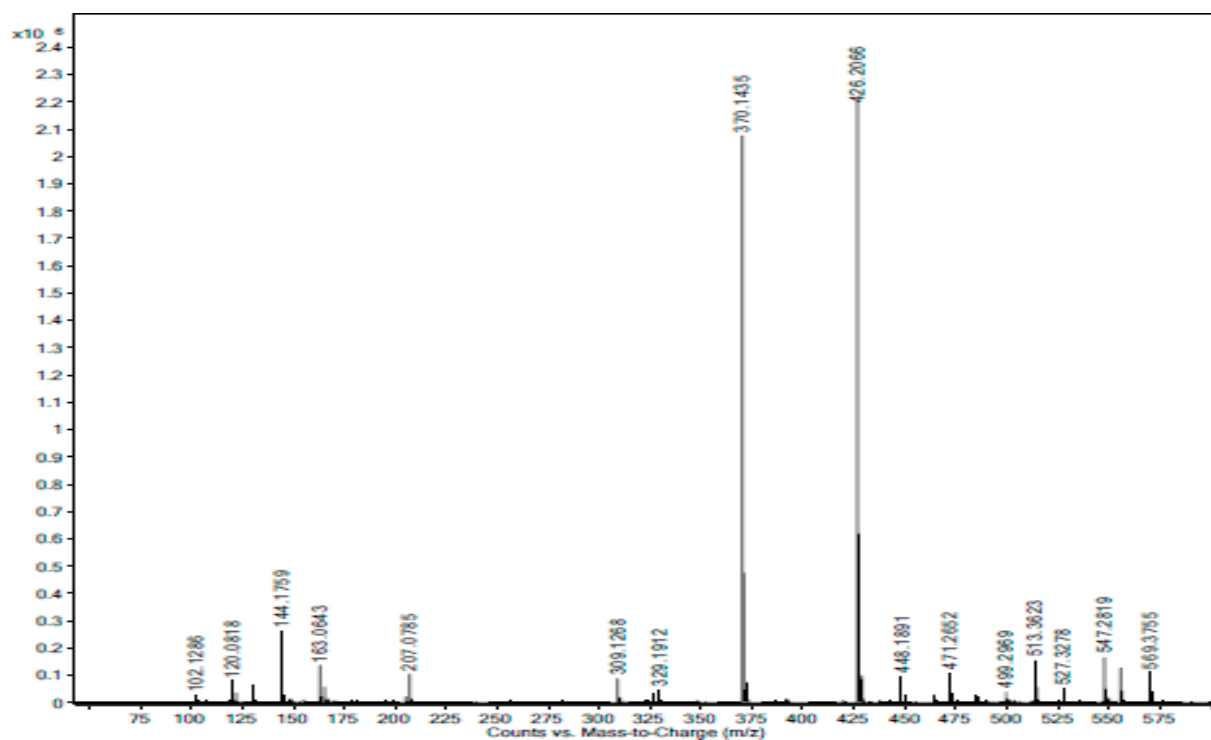Figure S30. HRMS (ESI<sup>+</sup>) of compound 4j.

Kashif/Dr. Najeeb/RMO-13/CDCl<sub>3</sub>  
PROTON

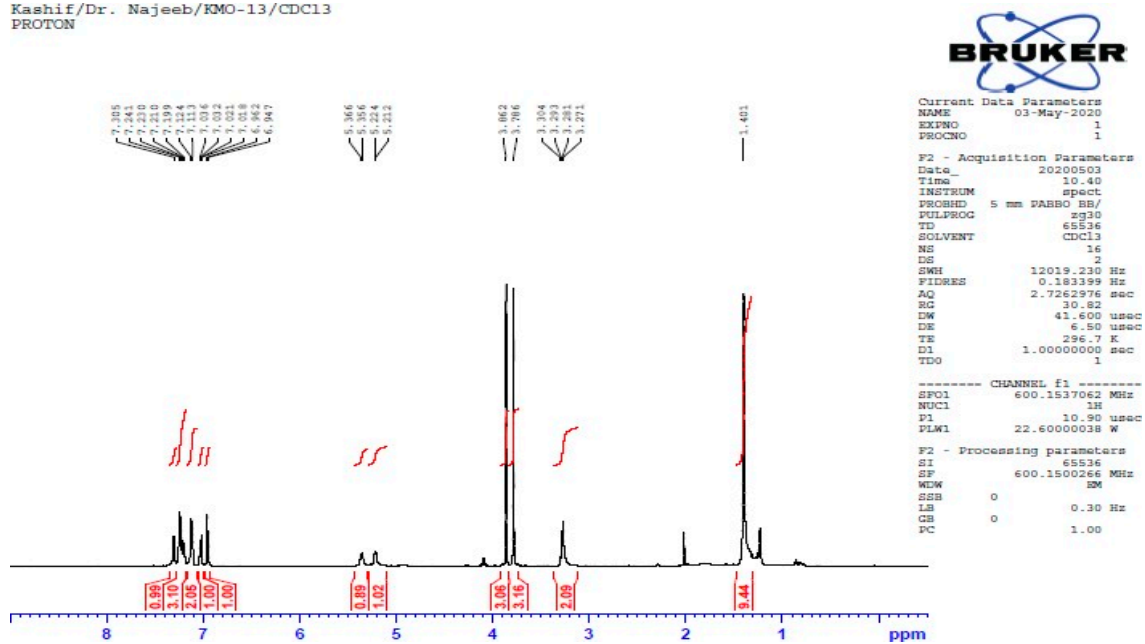Figure S31. <sup>1</sup>H-NMR (CDCl<sub>3</sub>, 600 MHz) of compound 4k.

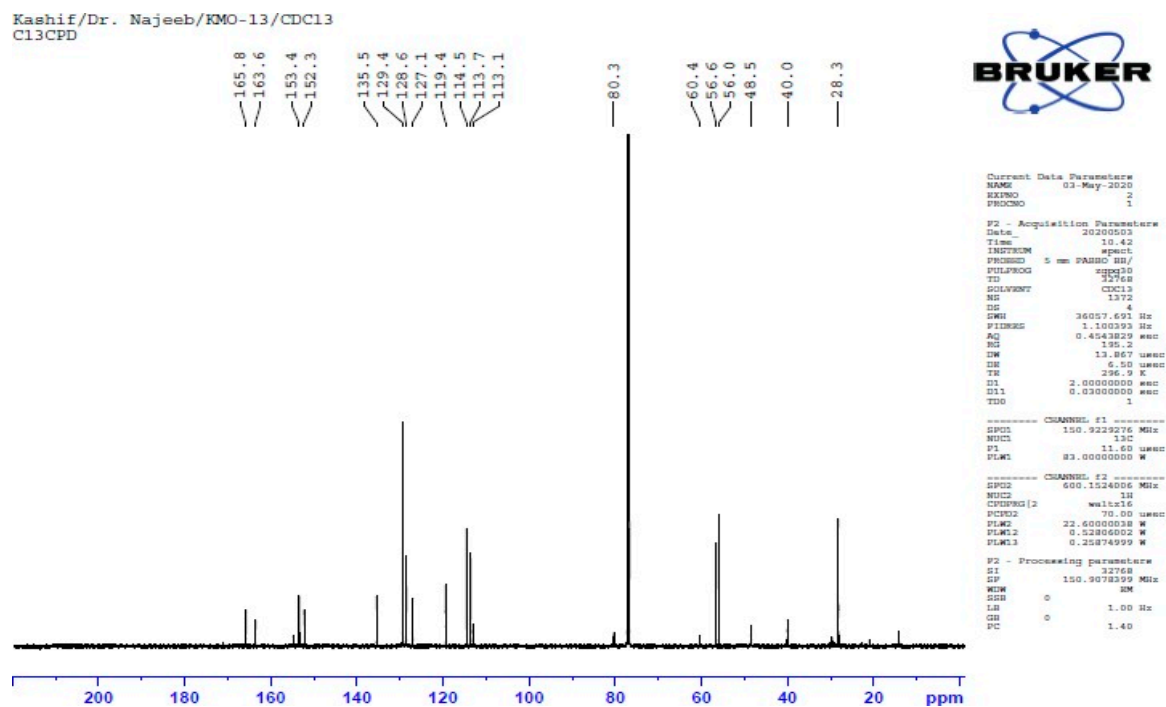Figure S32. <sup>13</sup>C-NMR (CDCl<sub>3</sub>, 125 MHz) of compound 4k.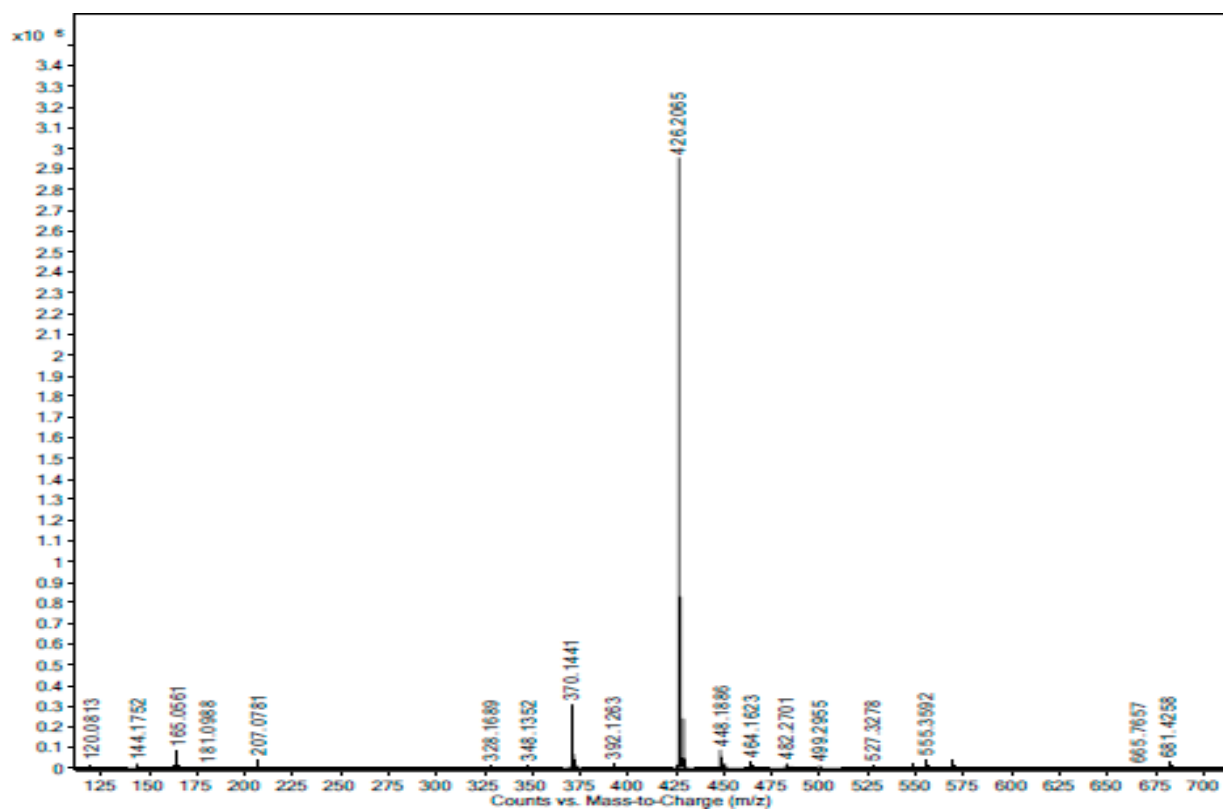Figure S33. HRMS (ESI<sup>+</sup>) of compound 4k.

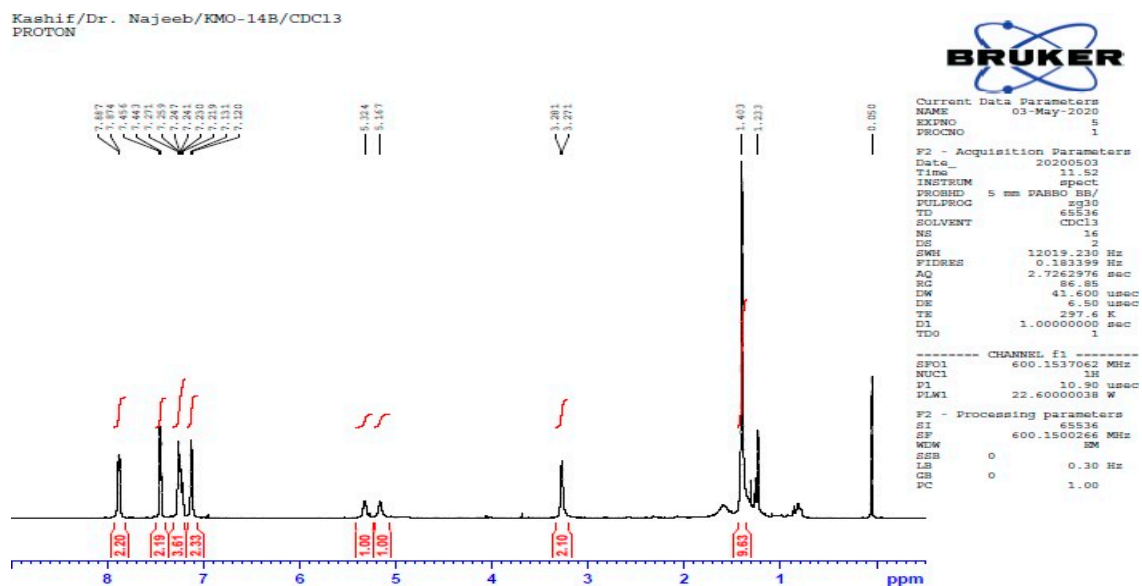Figure S34. <sup>1</sup>H-NMR (CDCl<sub>3</sub>, 600 MHz) of compound 4l.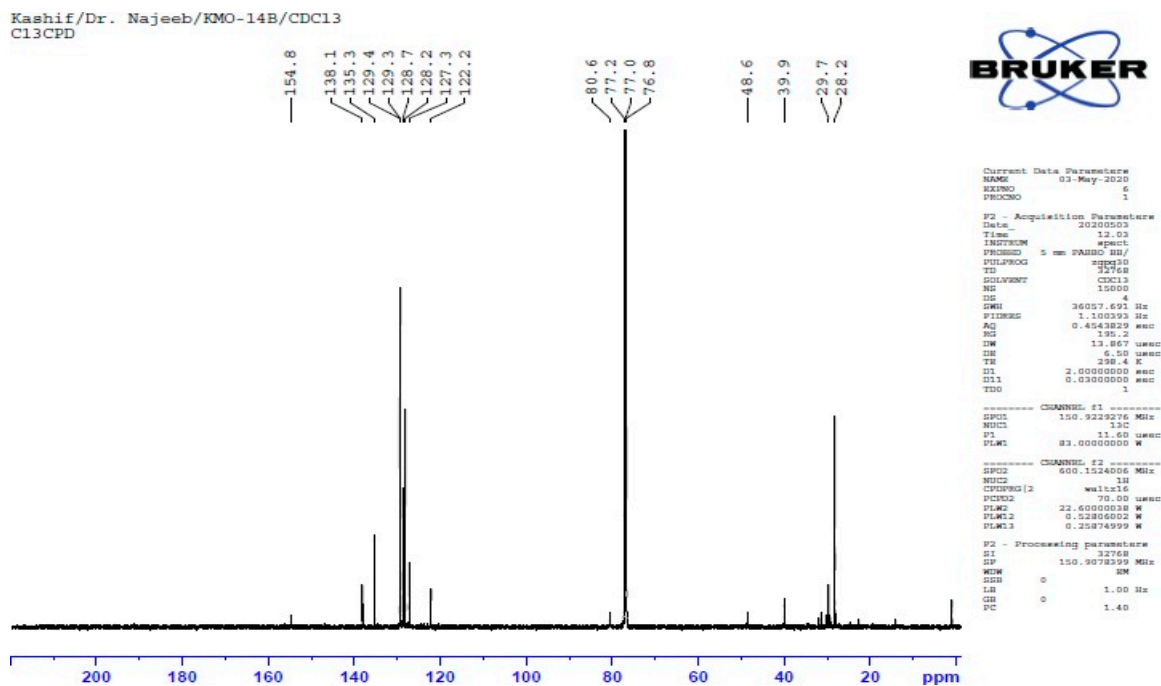Figure S35. <sup>13</sup>C-NMR (CDCl<sub>3</sub>, 125 MHz) of compound 4l.

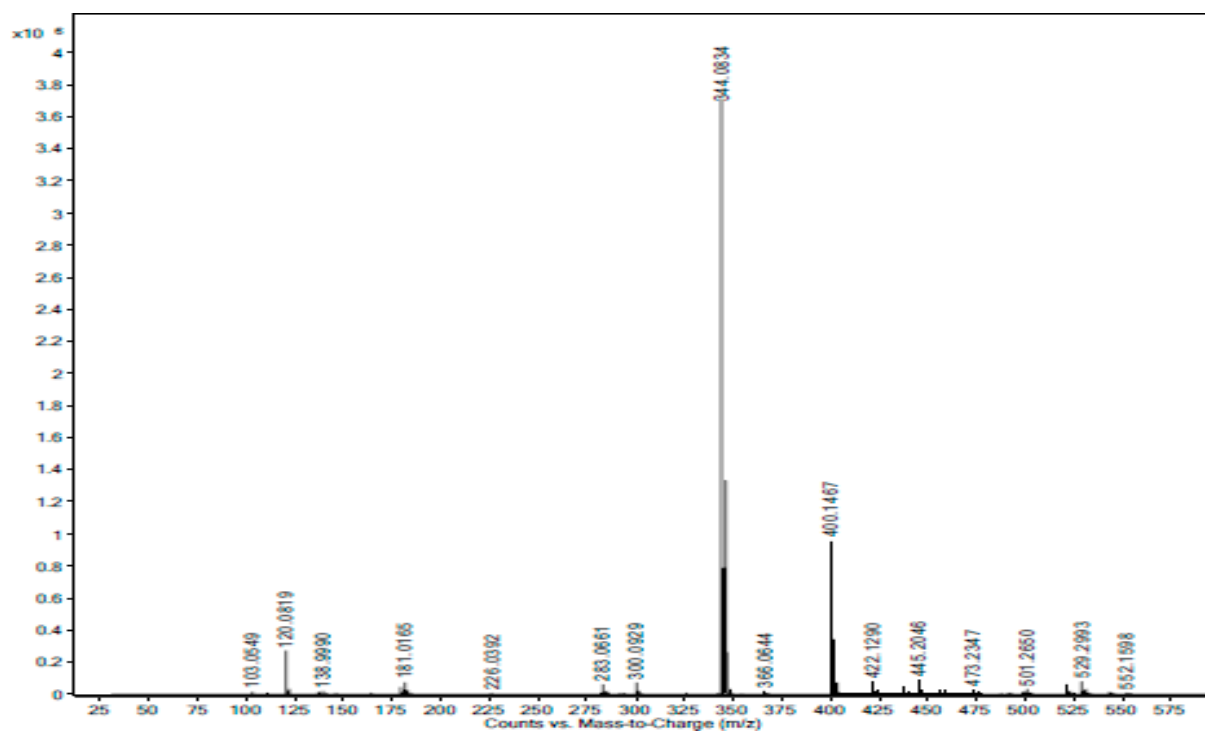

Figure S36. HRMS (ESI<sup>+</sup>) of compound 41.

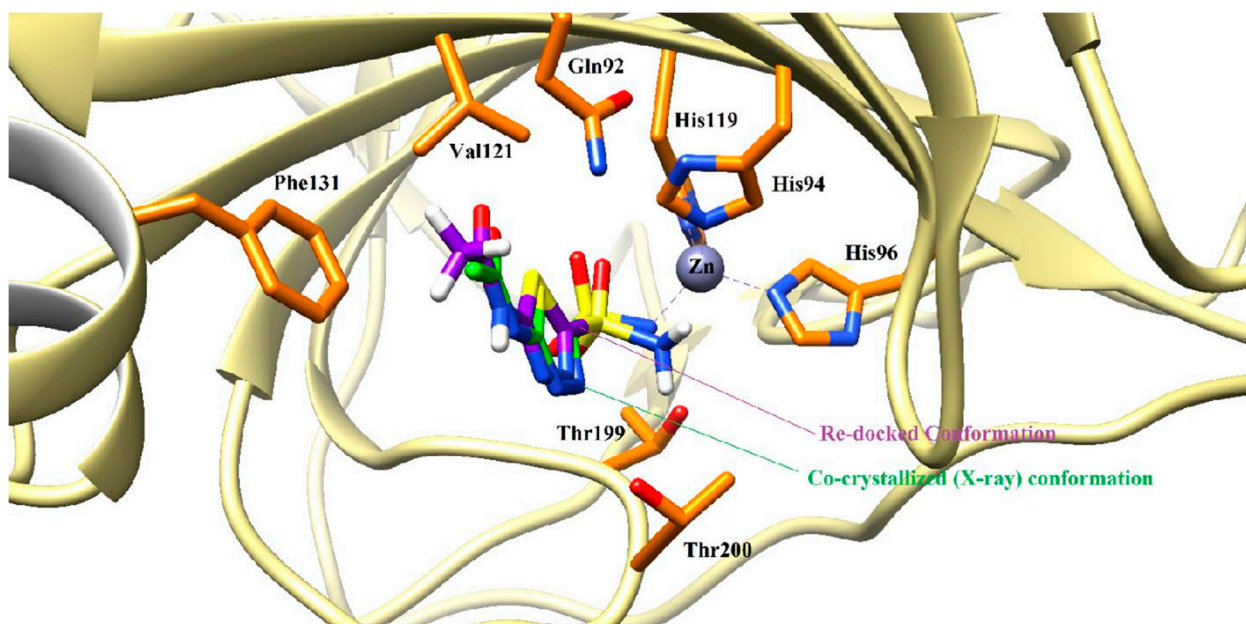

Figure S37. The superimposed view of re-docked orientation of acetazolamide with its reference conformation in the crystal structure (PDB code: 3HS4). The binding residues are shown in orange stick, protein is presented in ribbon model, the X-ray determined conformation and re-docked modes are shown in green and purple stick models, respectively.
